# Supplementary material for: In–Co–Zn/C–N catalysts derived from ZIFs for selective hydrogenation of CO2 into methanol
Source: Royal Society of Chemistry journal article supplement (doi:10.1039/d1cy01663f), 2021-11-20
Supplement: d1cy01663f1.pdf [file d1cy01663f1.pdf]

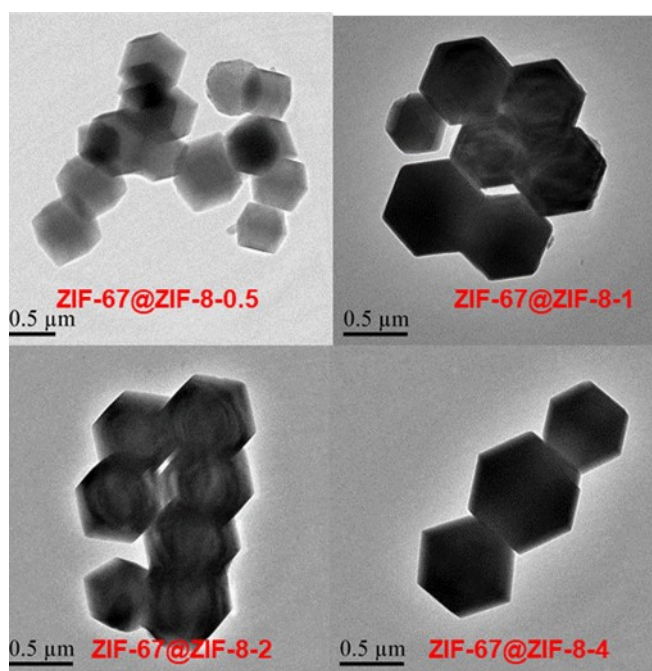

Fig.S1 TEM images of ZIF-67@ZIF-8

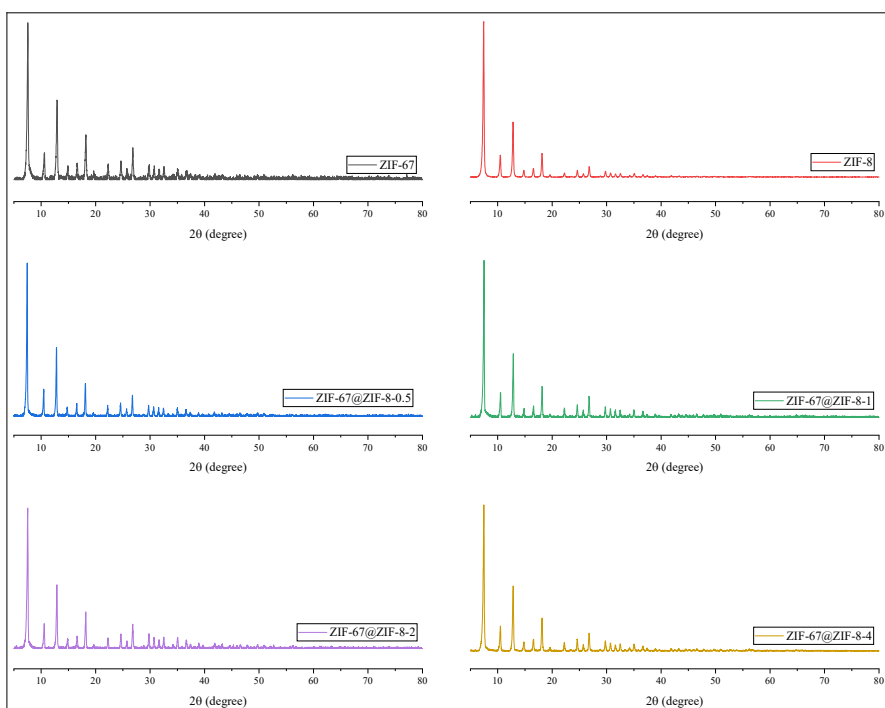

Fig. S2 XRD patterns of ZIF-67@ZIF-8, ZIF-67 and ZIF-8

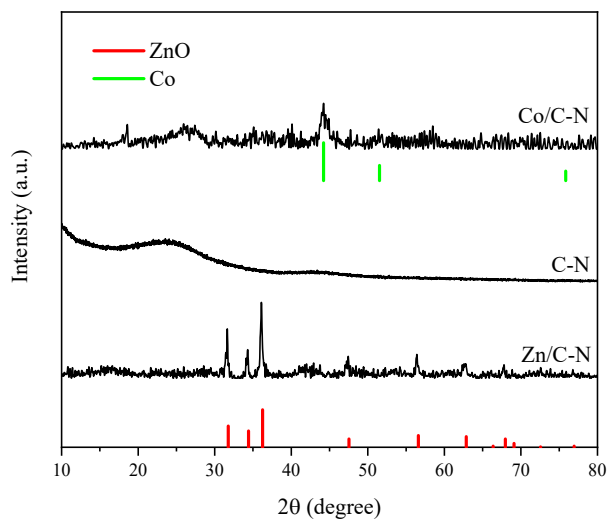

Fig. S3 XRD patterns of Co/C-N, Zn/C-N and C-N

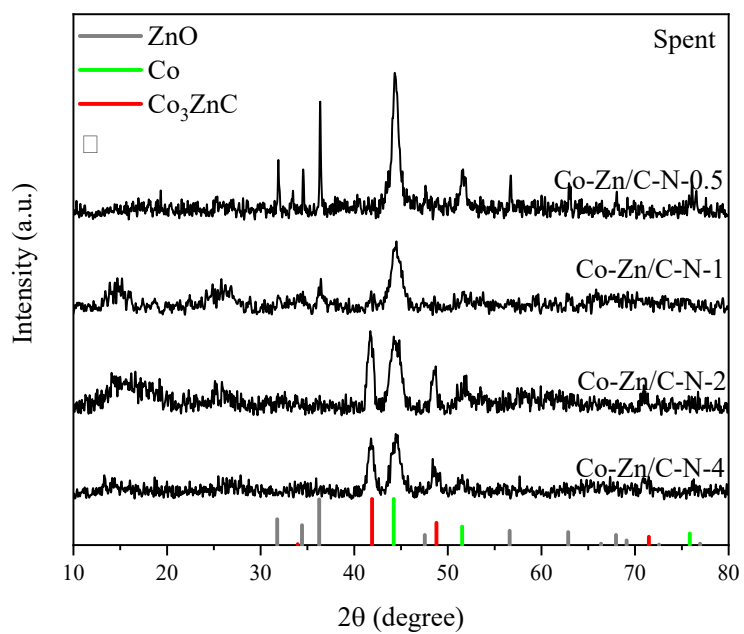

Fig. S4 XRD patterns of Co-Zn/C-N catalyst after reaction

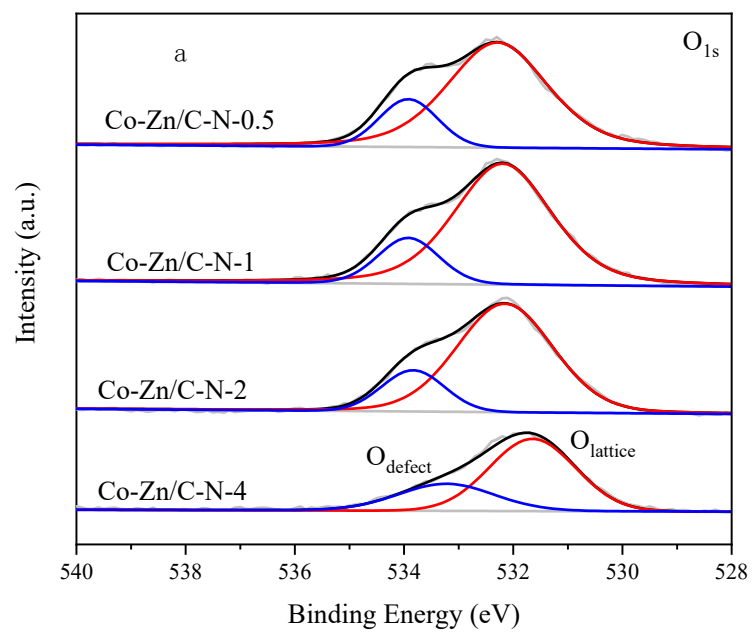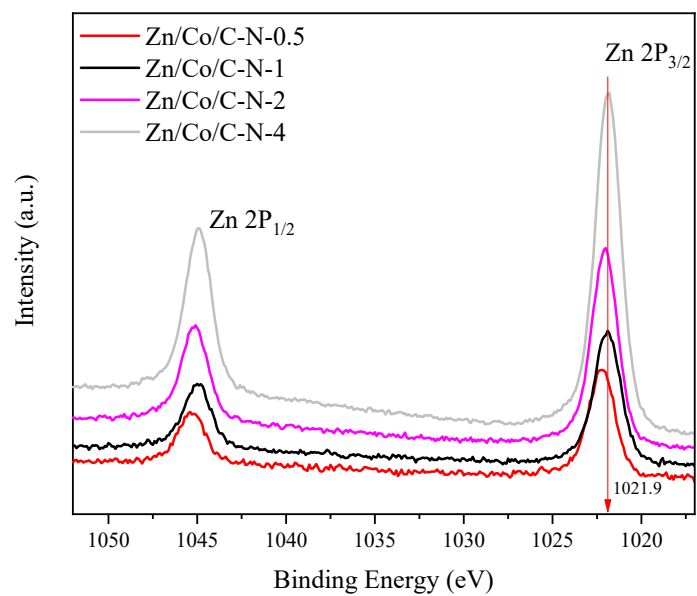

Fig. S5 XPS spectrum of O1s and Zn 2p 3/2 of Co-Zn/C-N catalyst

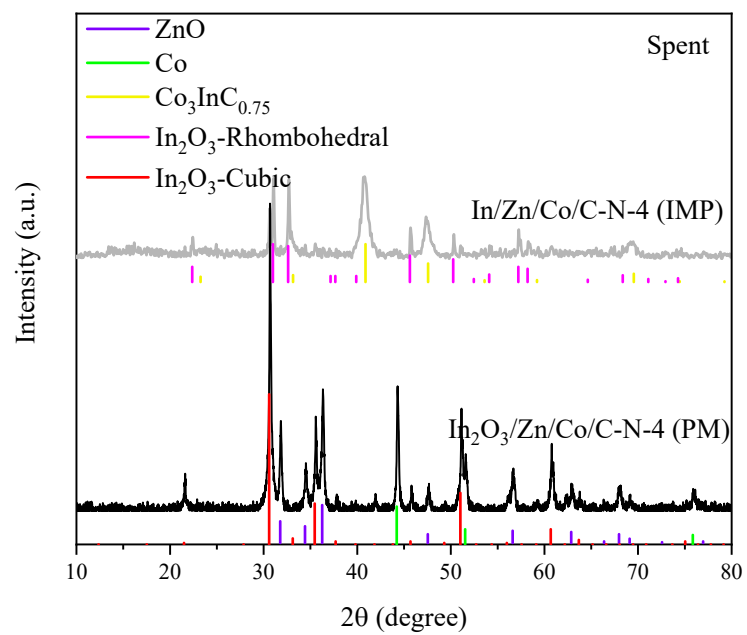

Fig. S6 XRD patterns of spent In-Co-Zn/C-N catalyst
